# Supplementary material
Source: MDPI journal article supplement (https://www.mdpi.com/2313-0105/9/5/252)
Supplement: s1 [file s1 › batteries-2294944-supplementary.pdf]

# Engineered Grain Boundary Enables the Room Temperature Solid-State Sodium Metal Batteries

Yang Li <sup>1,2</sup>, Zheng Sun <sup>1</sup>, Haibo Jin <sup>1</sup> and Yongjie Zhao <sup>1,2,\*</sup>

1 Beijing Key Laboratory of Construction Tailorable Advanced Functional Materials and Green Applications, School of Materials Science and Engineering, Beijing Institute of Technology, Beijing 100081, China

2 Yangtze Delta Region Academy of Beijing Institute of Technology, Jiaxing 314000, China

\* Correspondence: zhaoyj14@bit.edu.cn

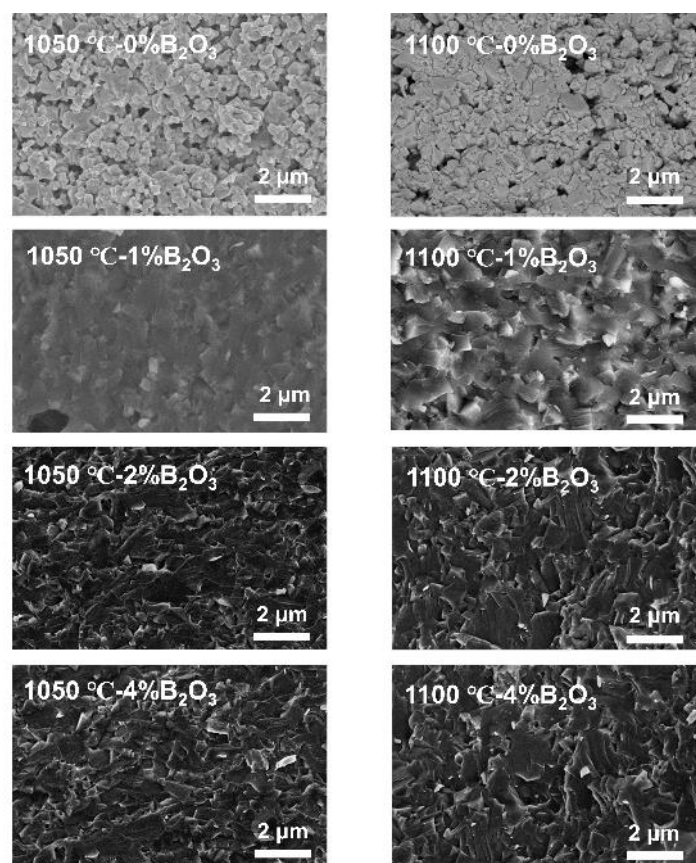

**Figure S1.** Sectional SEM images of the NZSP- $x$ B<sub>2</sub>O<sub>3</sub>-1050 °C and NZSP - $x$ B<sub>2</sub>O<sub>3</sub>-1100 °C ceramics.

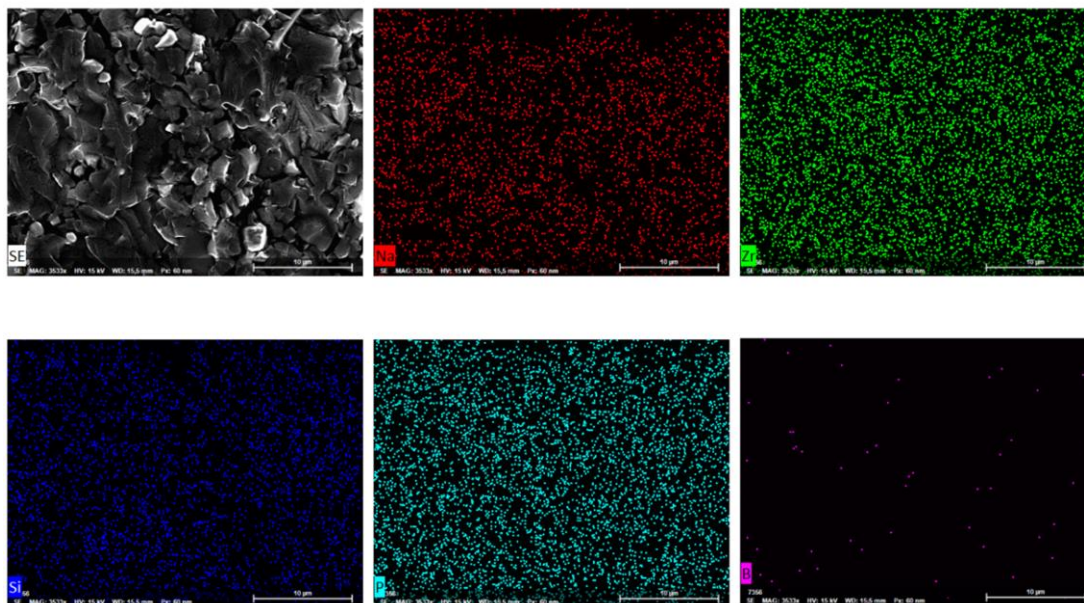

**Figure S2.** EDS mapping results with an enlarged scale for NZSP-2%B<sub>2</sub>O<sub>3</sub>-1150 °C ceramic.

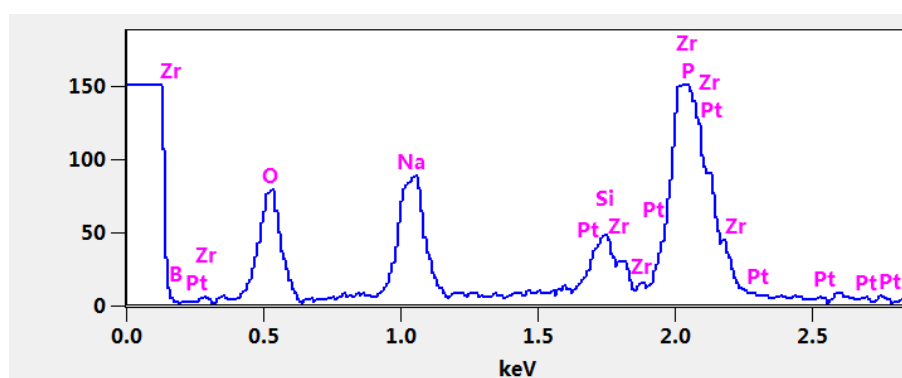

**Figure S3.** Energy spectrum element analysis of grain boundaries for NZSP-2%B<sub>2</sub>O<sub>3</sub>-1150 °C ceramic.

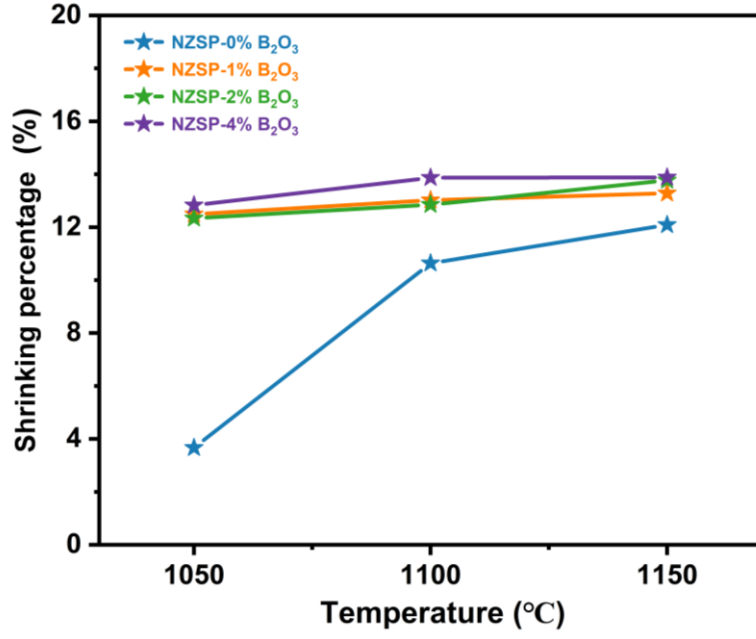

**Figure S4.** Shrinkage variation of the NZSP- $x$ B<sub>2</sub>O<sub>3</sub> ceramics pellets sintered at different temperatures.

The shrinking percentage ( $\varphi$ ) of samples can be described by  $\varphi = \frac{D_0 - D_1}{D_0} \times 100\%$ , wherein  $D_0$  is the diameter of green pellets and  $D_1$  is the diameter of the as-sintered samples.

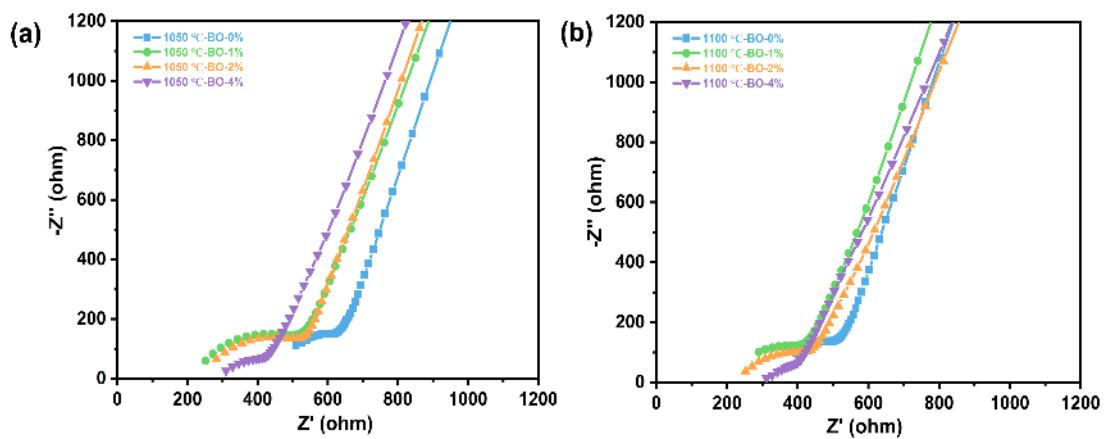

**Figure S5.** Nyquist plots of the room temperature EIS of (a) NZSP- $x$ B<sub>2</sub>O<sub>3</sub>-1050 °C and (b) NZSP- $x$ B<sub>2</sub>O<sub>3</sub>-1100 °C ceramic pellets.

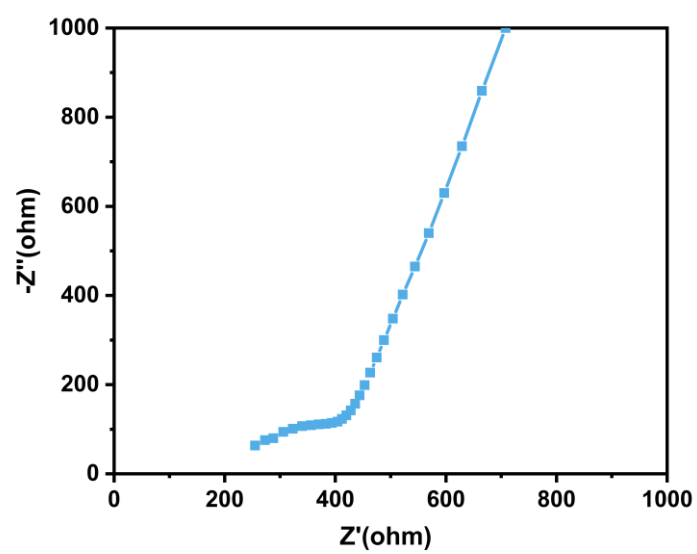

**Figure S6.** Nyquist plots of NZSP-1250 °C.

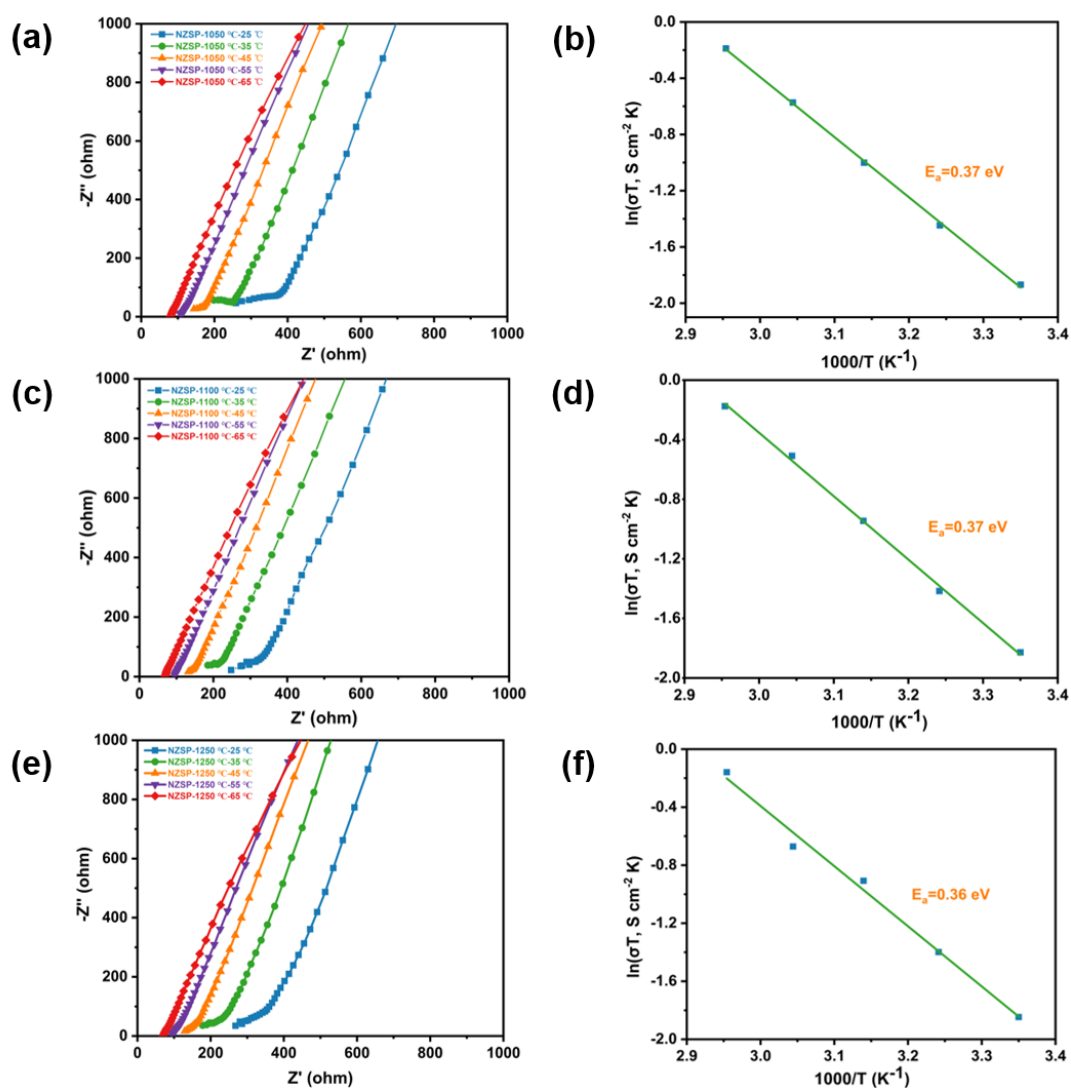

**Figure S7.** The temperature-dependent Nyquist plots of (a) NZSP-4%B<sub>2</sub>O<sub>3</sub>-1050 °C, (c) NZSP-4%B<sub>2</sub>O<sub>3</sub>-1100 °C, and (e) NZSP-1250 °C. The Arrhenius temperature-dependent total conductivity plots of (b) NZSP-4%B<sub>2</sub>O<sub>3</sub>-1050 °C, (d) NZSP-4%B<sub>2</sub>O<sub>3</sub>-1100 °C, and (f) NZSP-1250 °C.

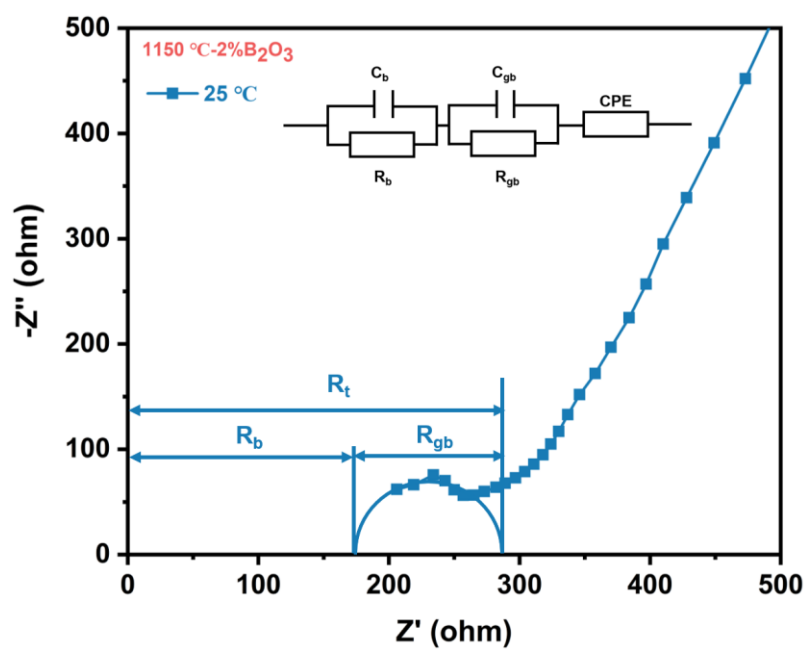

**Figure S8.** Nyquist plot of NZSP-2%B<sub>2</sub>O<sub>3</sub>-1150 °C at room temperature, simulation results based on the equivalent circuit, and illustration of analysis of  $R_b$  and  $R_{gb}$ .

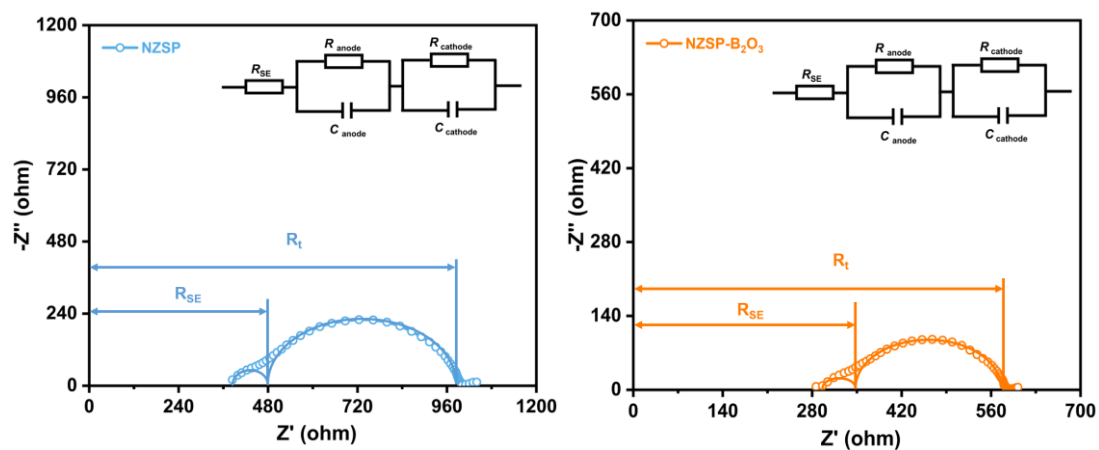

**Figure S9.** Room temperature Nyquist plots of symmetric sodium metal batteries based on NZSP-1250 °C and NZSP-2%B<sub>2</sub>O<sub>3</sub>-1150 °C ceramic electrolytes. The insets are the equivalent circuit and illustration of analysis of  $R_{SE}$  and  $R_t$ .

**Table S1.** Cell Parameters and volume of NZSP- $x$ B<sub>2</sub>O<sub>3</sub>

| Composition                                       | Space group      | $a$ (Å) | $b$ (Å) | $c$ (Å) | Volum<br>e (Å <sup>3</sup> ) | $S=R_{wp}/R_e$ |
|---------------------------------------------------|------------------|---------|---------|---------|------------------------------|----------------|
| NZSP-1250 °C                                      | C2/c (96.8 wt.%) | 15.5443 | 9.0152  | 9.1834  | 1080.51                      | 1.20           |
| NZSP-1%B <sub>2</sub> O <sub>3</sub> -<br>1150 °C | C2/c (98.1 wt.%) | 15.6672 | 9.0556  | 9.2166  | 1085.99                      | 1.38           |
| NZSP-2%B <sub>2</sub> O <sub>3</sub> -<br>1150 °C | C2/c (97.7 wt.%) | 15.6673 | 9.0591  | 9.2156  | 1085.19                      | 1.47           |
| NZSP-4%B <sub>2</sub> O <sub>3</sub> -<br>1150 °C | C2/c (96.4 wt.%) | 15.6714 | 9.0564  | 9.2187  | 1085.88                      | 1.25           |

These results of Rietveld refinement were obtained according to the constructed model structure.
